# Supplementary material for: Wear Assessment of Tibial Inserts Made of Highly Cross-Linked Polyethylene Supplemented with Dodecyl Gallate in the Total Knee Arthroplasty
Source: MDPI journal article supplement (doi:10.3390/polym13111847), 2021-06-02
Supplement: s1 [file s1]

# Supplementary Material: Wear Assessment of Tibial Inserts Made of Highly Cross-Linked Polyethylene Supplemented with Dodecyl Gallate in the Total Knee Arthroplasty

Min Zhang, Jia-Yu Wang, Jian Su, Jian-Jun Wang, Shi-Tong Yan, Yi-Chao Luan and Cheng-Kung Cheng

## Loading in one cycle of gait movement

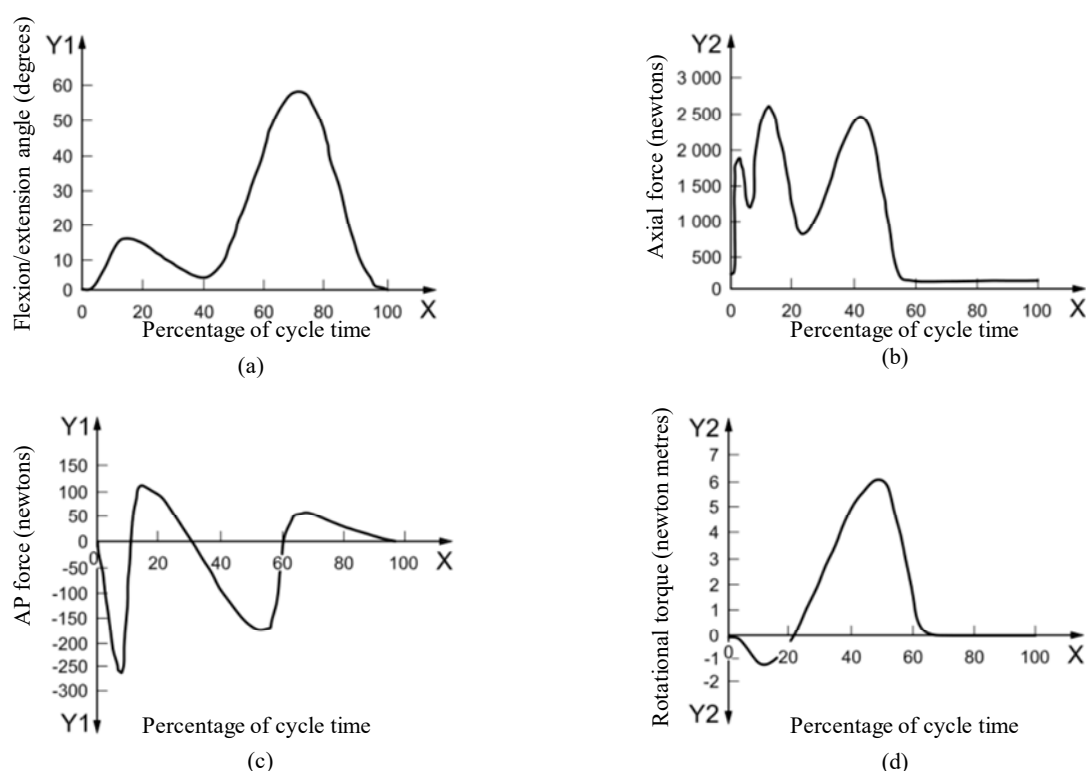

**Figure S1.** Loading in one cycle of gait movement <sup>1</sup>. (a) Variation of flexion angle with time. (b) Variation of axial force with time. (c) Variation of anteroposterior (AP) force with time. (d) Variation of rotation torque with time.

## Reference

1. ISO 14243-1, Implants for Surgery—Wear of Total Knee-Joint Prostheses. In *Part 1: Loading and Displacement Parameters for Wear-Testing Machines with Load Control and Corresponding Environmental Conditions for Test*; ISO Copyright Office: Geneva, Switzerland, 2009.
